# Supplementary material
Source: PubMed Central journal article supplement (PMC6386193)
Supplement: NIHMS1520772-supplement-1.pdf [file NIHMS1520772-supplement-1.pdf]

**Supplementary Table 1.** Signature standard peptides selected for targeted analysis of transporter proteins. Bold letters indicate amino acids labeled with stable isotope ( $^{13}\text{C}$  and  $^{15}\text{N}$ ).

| Gene Symbol                             | Alias                                   | Analyte or IS | Signature Peptide       | Parent Ion | Product Ions |        |       |       | Reference           |
|-----------------------------------------|-----------------------------------------|---------------|-------------------------|------------|--------------|--------|-------|-------|---------------------|
|                                         |                                         |               |                         |            | 1            | 2      | 3     | 4     |                     |
| <b>SLC Transporter</b>                  |                                         |               |                         |            |              |        |       |       |                     |
| SLC10A1                                 | NTCP                                    | Analyte       | GIYDGLK                 | 440.7      | 710.3        | 547.3  | 432.2 | 260.2 | Uchida et al., 2011 |
|                                         |                                         | IS            | <b>GIYDGLK</b>          | 444.7      | 718.3        | 555.3  | 440.3 | 268.2 |                     |
| SLC51A                                  | OST $\alpha$                            | Analyte       | YTADLLEVLK              | 582.8      | 601.4        | 829.5  | 900.5 | 260.2 | Uchida et al., 2011 |
|                                         |                                         | IS            | <b>YTADLLEVLK</b>       | 586.8      | 609.4        | 837.5  | 908.6 | 268.2 |                     |
| SLCO1B1                                 | OATP1B1                                 | Analyte       | YVEQQYQGPSSK            | 707.3      | 766.4        | 603.3  | 418.2 | 234.1 | Prasad et al., 2014 |
|                                         |                                         | IS            | <b>YVEQQYQGPSSK</b>     | 711.3      | 774.4        | 611.3  | 426.2 | 242.2 |                     |
| SLCO1B3                                 | OATP1B3                                 | Analyte       | IYNSVFFGR               | 551.8      | 826.4        | 712.4  | 625.3 | 526.3 | Uchida et al., 2011 |
|                                         |                                         | IS            | <b>IYNSVFFGR</b>        | 556.8      | 836.4        | 722.4  | 635.4 | 536.3 |                     |
| SLCO2B1                                 | OATP2B1                                 | Analyte       | SSPAVEQQLLVSGPGK        | 798.9      | 544.3        | 445.2  | 358.2 | 301.2 | Prasad et al., 2014 |
|                                         |                                         | IS            | <b>SSPAVEQQLLVSGPGK</b> | 802.9      | 552.3        | 453.3  | 366.2 | 309.2 |                     |
| <b>ABC Transporter</b>                  |                                         |               |                         |            |              |        |       |       |                     |
| ABCB11                                  | BSEP                                    | Analyte       | STALQLIQR               | 515.3      | 657.4        | 416.3  | 529.3 | 770.5 | Uchida et al., 2011 |
|                                         |                                         | IS            | <b>STALQLIQR</b>        | 520.3      | 667.4        | 426.3  | 539.4 | 780.5 |                     |
| ABCC2                                   | MRP2                                    | Analyte       | LTIIQDPILFSGSLR         | 885.5      | 666.4        | 1329.7 | 989.6 | 519.3 | Li et al., 2008     |
|                                         |                                         | IS            | <b>LTIIQDPILFSGSLR</b>  | 890.5      | 676.4        | 1339.7 | 999.6 | 529.3 |                     |
| ABCC3                                   | MRP3                                    | Analyte       | AEGEISDPFR              | 560.8      | 920.4        | 621.3  | 419.2 | 175.1 | Uchida et al., 2011 |
|                                         |                                         | IS            | <b>AEGEISDPFR</b>       | 565.8      | 930.5        | 631.3  | 429.2 | 185.1 |                     |
| ABCC4                                   | MRP4                                    | Analyte       | AEEAALTETAK             | 538.3      | 733.4        | 875.5  | 549.3 | 662.4 | Wang et al., 2015   |
|                                         |                                         | IS            | <b>AEEAALTETAK</b>      | 542.3      | 741.4        | 883.5  | 557.3 | 670.4 |                     |
| <b>Marker Proteins</b>                  |                                         |               |                         |            |              |        |       |       |                     |
| Na <sup>+</sup> -K <sup>+</sup> -ATPase | Na <sup>+</sup> -K <sup>+</sup> -ATPase | Analyte       | AAVPDAVGK               | 414.2      | 685.4        | 586.3  | 374.2 | 204.1 | Uchida et al., 2011 |
|                                         |                                         | IS            | <b>AAVPDAVGK</b>        | 418.2      | 693.4        | 594.3  | 382.3 | 212.1 |                     |
