# Supplementary material
Source: PubMed Central journal article supplement (PMC6386193)
Supplement: NIHMS1520772-supplement-2.pdf [file NIHMS1520772-supplement-2.pdf]

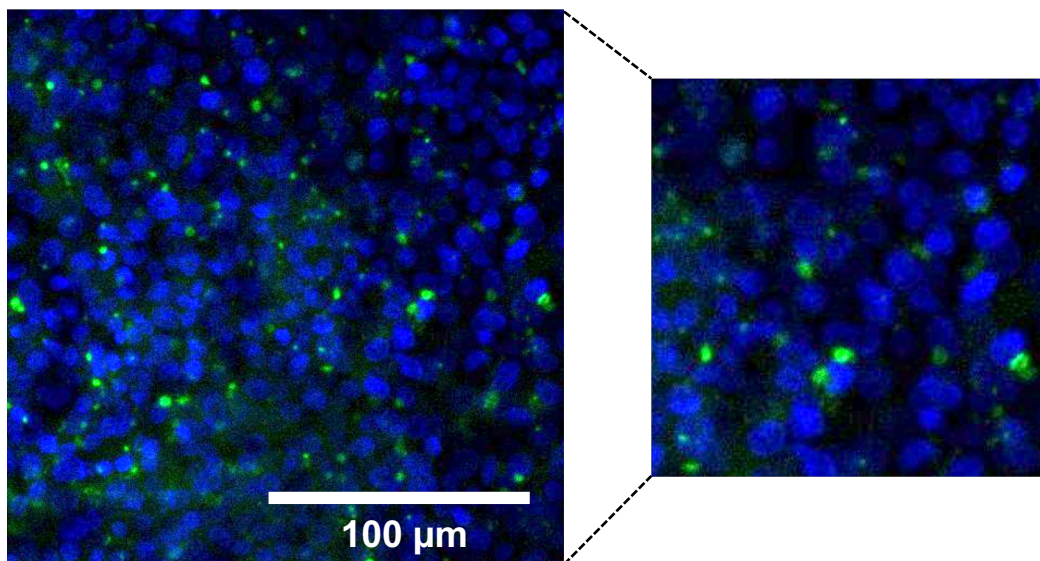

**Supplementary Figure 1.** Disposition of 5 (and 6)-carboxy-2',7'-dichlorofluorescein (CDF) (green) in 1-week cultures of Huh7 cells. Nuclei were visualized with DAPI (blue). Huh7 cell cultures were treated for 10 min with 2  $\mu\text{M}$  CDF diacetate and 5  $\mu\text{M}$  DAPI, followed by washes with HBSS and confocal microscopy.
